# Supplementary material for: Antarctic sponges from the Terra Nova Bay (Ross Sea) host a diversified bacterial community
Source: PubMed Central journal article supplement (PMC6834628; doi:10.1038/s41598-019-52491-0), 2019-11-06
Supplement: 41598_2019_52491_MOESM1_ESM.pdf [file 41598_2019_52491_MOESM1_ESM.pdf]

## Supplementary materials

Manuscript Title: *Antarctic sponges from the Terra Nova Bay (Ross Sea) host a diversified bacterial community*

Authors: *Savoca Serena, Lo Giudice Angelina, Papale Maria, Mangano Santina, Caruso Consolazione, Spanò Nunziacarla, Michaud Luigi, Rizzo Carmen*

## LIST

### Supplementary materials

**Figure S1.** Neighbor-joining phylogenetic tree based on 16S rRNA gene sequences of Gram-negative strains (a) and Gram-positive strains (b) isolated from sponge samples.

**Figure S2.** Non-metric multidimensional scaling analysis (nMDS) computed on Bray-Curtis similarity analysis conducted on the bacterial community associated with sponges for sampling site.

**Table S1.** Ecological indices of Antarctic sponge-associated bacterial communities compared to seawater.

a)

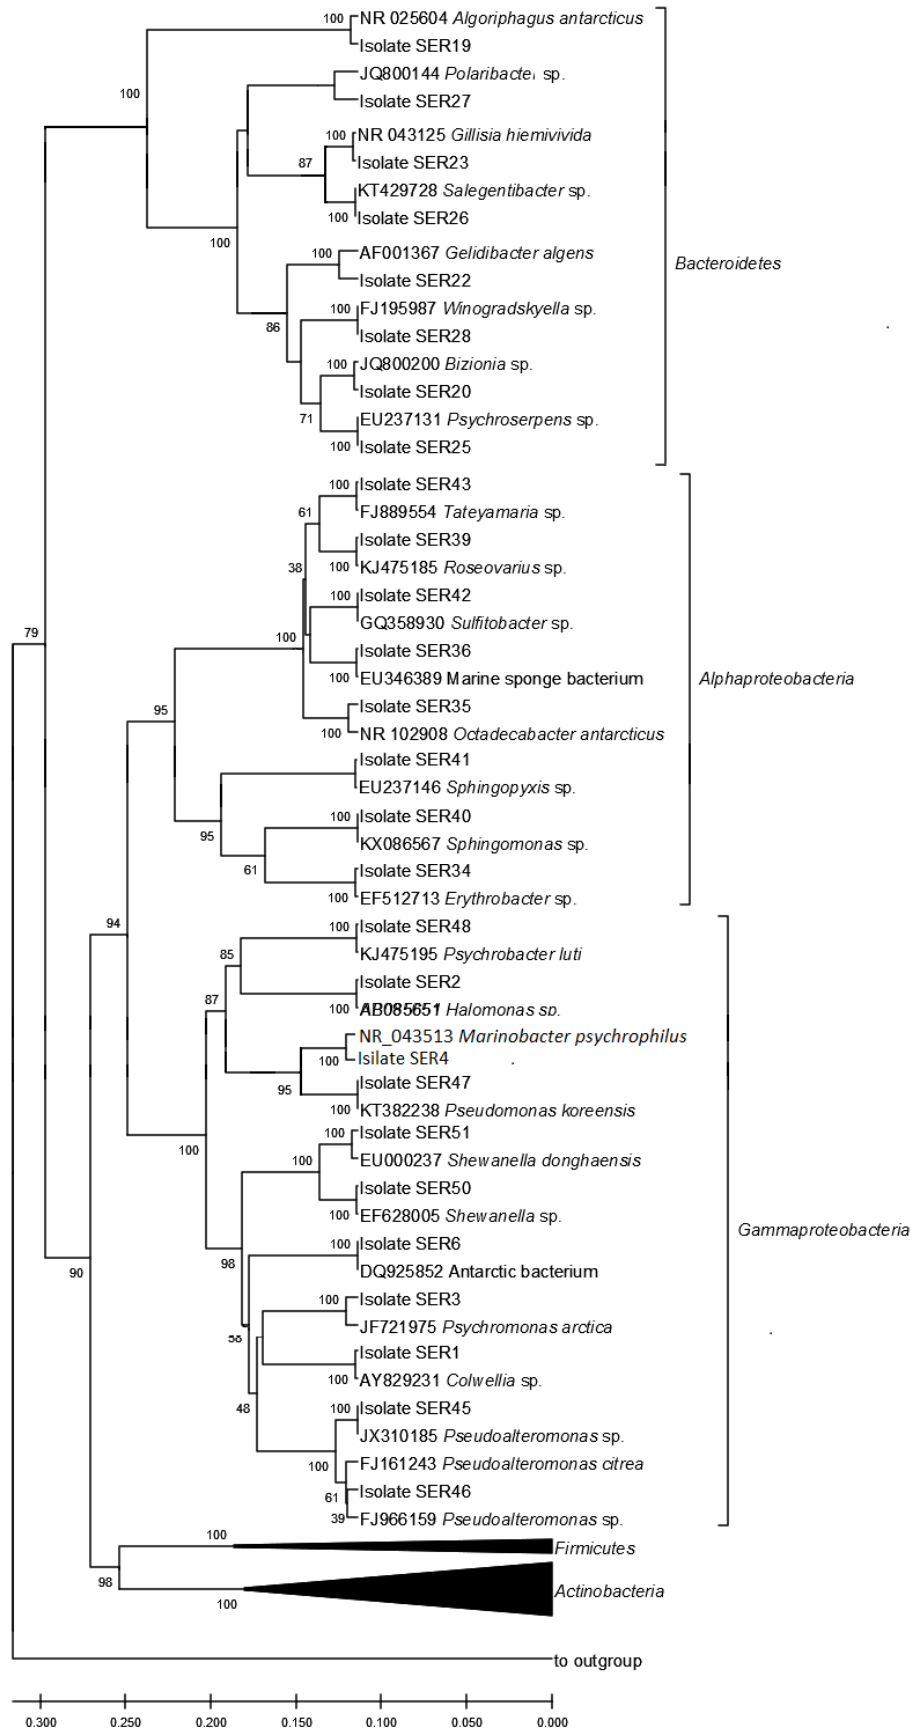

b)

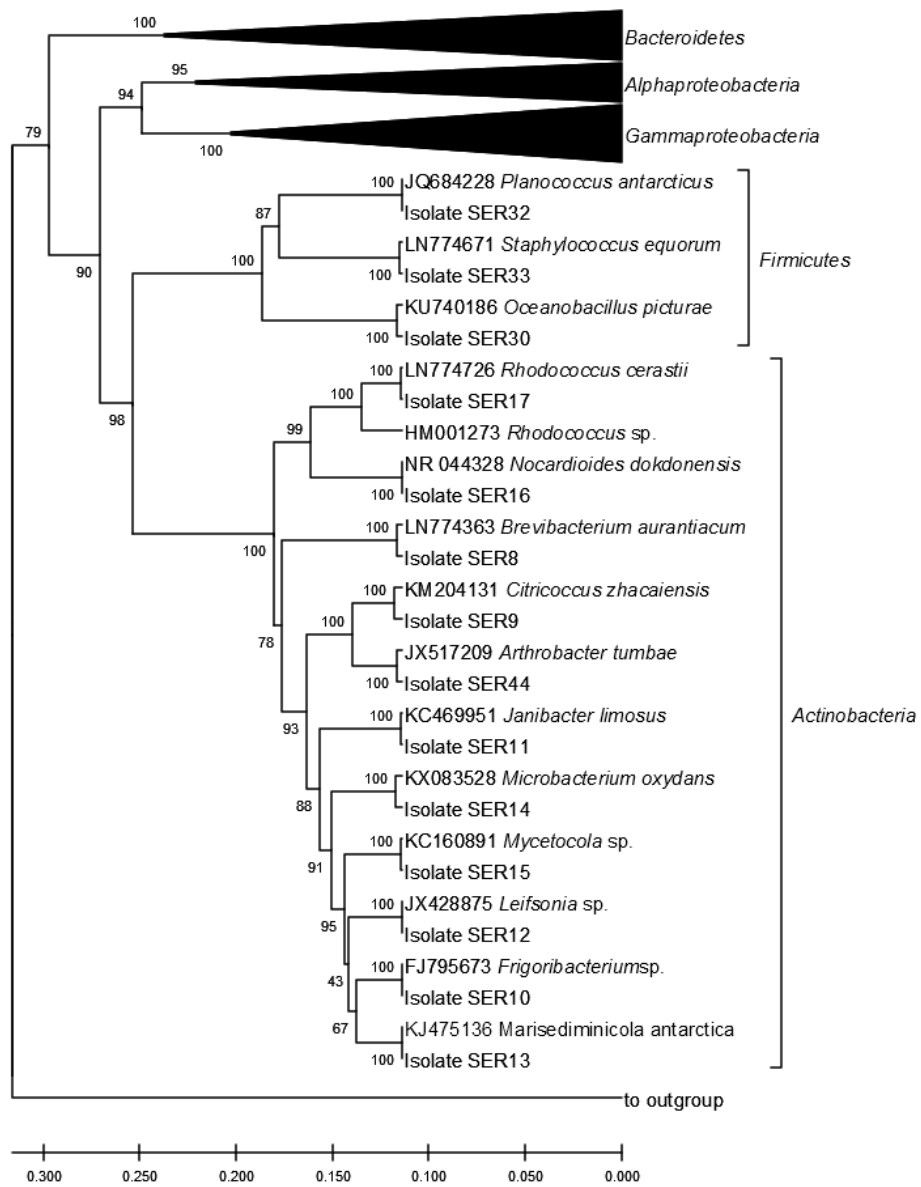

Figure S1. Savoca et al.

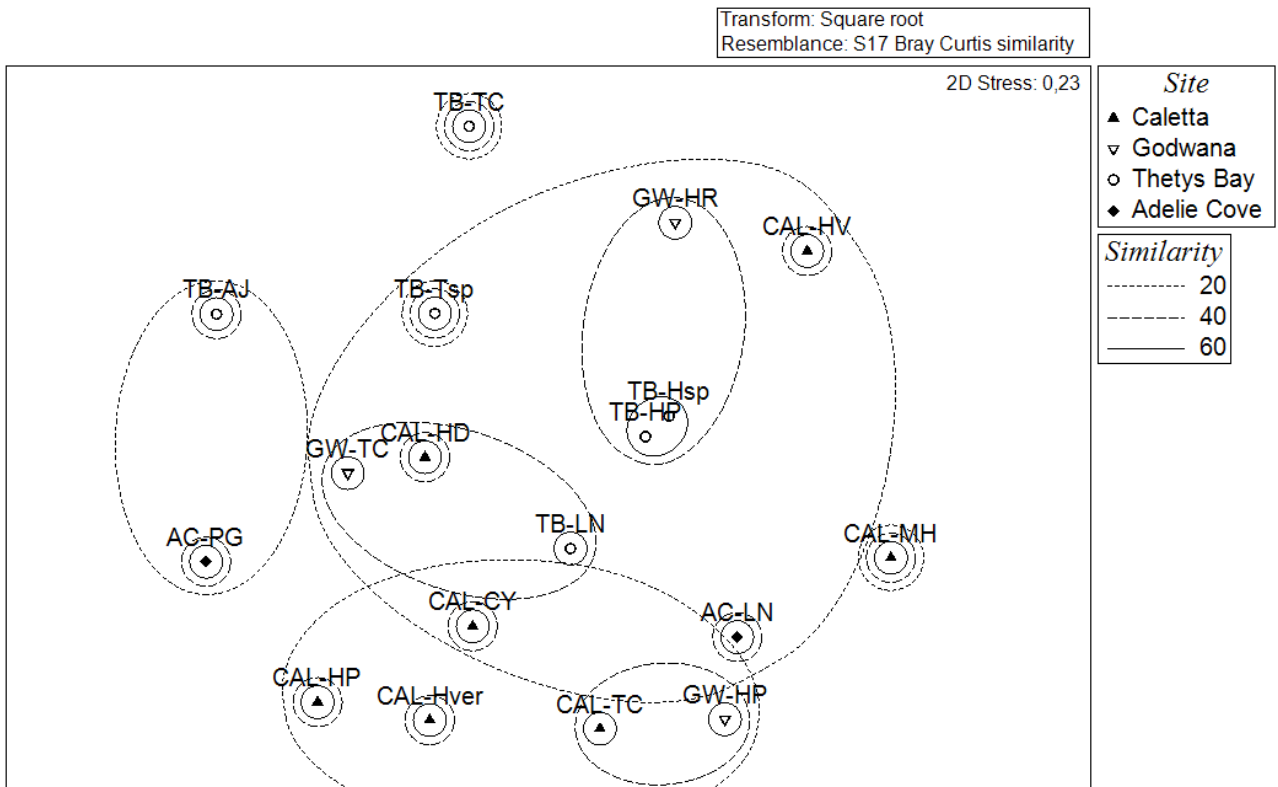

**Figure S2.** Savoca et al.

**Table S1.** Ecological indices of Antarctic sponge-associated bacterial communities compared to seawater.

| Sample          | OTUs        |             |                    |                |
|-----------------|-------------|-------------|--------------------|----------------|
|                 | Taxa        | Chao1       | np-Shannon<br>(H') | Simpson<br>(D) |
| AJ              | 10.0        | 12.0        | 1.9                | 0.83           |
| LN              | 6.0         | 6.0         | 1.03               | 0.51           |
| CY              | 10.0        | 11.0        | 2.15               | 0.88           |
| HP              | 10.0        | 10.2        | 1.78               | 0.78           |
| PG              | 12.0        | 13.5        | 2.25               | 0.87           |
| MH              | 5.0         | 8.0         | 0.59               | 0.27           |
| HD              | 11.0        | 14.3        | 1.12               | 0.52           |
| HV              | 6.0         | 6.5         | 0.97               | 0.45           |
| HR              | 10.0        | 11.0        | 2.13               | 0.86           |
| Hsp             | 8.0         | 13.0        | 0.84               | 0.39           |
| TC              | 17.0        | 16.2        | 1.80               | 0.69           |
| TS              | 7.0         | 28.0        | 1.95               | 0.86           |
| Tsp             | 13.0        | 28.0        | 1.91               | 0.73           |
| Hver            | 13.0        | 15.5        | 1.74               | 0.71           |
| <i>Seawater</i> | <i>41.0</i> | <i>54.2</i> | <i>2.14</i>        | <i>0.75</i>    |
